# Supplementary material
Source: ML conference proceedings conference paper supplement (https://proceedings.mlr.press/v51/mattei16.html)
Supplement: Supplementary file [file mattei16-supp.pdf]

# Globally Sparse Probabilistic PCA - Supplementary Material

## 1. Detailed Inference for the relaxed model

We denote  $\boldsymbol{\theta} = (\mathbf{u}, \alpha, \sigma)$  the vector of parameters. In order to maximize the evidence  $p(\mathbf{x}_1, \dots, \mathbf{x}_n | \boldsymbol{\theta})$ , we adopt a variational approach. We view  $\mathbf{y}_1, \dots, \mathbf{y}_n$  and  $\mathbf{W}$  as latent variables.

Given a (variational) distribution  $q$  over the space of latent variables, the variational free energy is given by

$$\mathcal{F}_q(\mathbf{x}_1, \dots, \mathbf{x}_n | \boldsymbol{\theta}) = -\mathbb{E}_q[\ln p(\mathbf{X}, \mathbf{Y}, \mathbf{W} | \boldsymbol{\theta})] - H(q) \quad (1)$$

where  $H$  denotes the differential entropy, and is an upper bound to the negative log-evidence:

$$-\ln p(\mathbf{X} | \boldsymbol{\theta}) = \mathcal{F}_q(\mathbf{X} | \boldsymbol{\theta}) - \text{KL}(q || p(\cdot | \boldsymbol{\theta})) \leq \mathcal{F}_q(\mathbf{X} | \boldsymbol{\theta}).$$

To be able to minimize  $\mathcal{F}_q(\mathbf{X} | \boldsymbol{\theta})$ , we make the following mean-field approximation on the variational distribution:

$$q(\mathbf{Y}, \mathbf{W}) = q(\mathbf{Y})q(\mathbf{W}) \quad (2)$$

We can now compute the variational posterior distribution  $q^*$  which minimizes the free energy. Note that two factorizations arise naturally. This will conveniently keep the size of the covariance matrices lower than  $d$ .

**Proposition 1** *The variational posterior distribution of the latent variables which minimizes the free energy is given by*

$$q^*(\mathbf{Y}) = \prod_{i=1}^n \mathcal{N}(\mathbf{y}_i | \boldsymbol{\mu}_i, \boldsymbol{\Sigma}) \quad (3)$$

and

$$q^*(\mathbf{W}) = \prod_{k=1}^p \mathcal{N}(\mathbf{w}_k | \mathbf{m}_k, \mathbf{S}_k) \quad (4)$$

where

$$\boldsymbol{\mu}_i = \frac{1}{\sigma} \boldsymbol{\Sigma} \mathbf{M}^T \mathbf{U} \mathbf{x}_i, \quad \boldsymbol{\Sigma} = \left( \mathbf{I}_d + \frac{1}{\sigma^2} \mathbf{M}^T \mathbf{U}^2 \mathbf{M} + \frac{1}{\sigma^2} \sum_{k=1}^p u_k^2 \mathbf{S}_k \right)^{-1}, \quad \mathbf{M} = (\mathbf{m}_1, \dots, \mathbf{m}_p)$$

and

$$\mathbf{m}_k = \frac{u_k}{\sigma} \mathbf{S}_k \sum_{i=1}^n x_{i,k} \boldsymbol{\mu}_i, \quad \mathbf{S}_k = \left( \frac{1}{\alpha} \mathbf{I}_d + \frac{n u_k^2}{\sigma^2} \boldsymbol{\Sigma} + \frac{u_k^2}{\sigma^2} \mathcal{M}^T \mathcal{M} \right)^{-1}, \quad \mathcal{M} = (\boldsymbol{\mu}_1, \dots, \boldsymbol{\mu}_p).$$

**Proof** *Variational distribution of the latent vectors.* Using a standard result in variational mean-field approximations (Bishop, 2006, chap. 10), we can write

$$\ln q^*(\mathbf{y}) = \mathbb{E}_{q(\mathbf{W})}[\ln p(\mathbf{X}, \mathbf{Y}, \mathbf{W}|\boldsymbol{\theta})]$$

which leads to the factorization  $q^*(\mathbf{y}) = \prod_{i \leq n} q^*(\mathbf{y}_i)$ . Then, for each  $i \leq n$ , we can write

$$\ln q^*(\mathbf{y}_i) = \mathbb{E}_{q(\mathbf{W})}[\ln p(\mathbf{X}, \mathbf{Y}, \mathbf{W}|\boldsymbol{\theta})] = \mathbb{E}_{q(\mathbf{W})}\left[\frac{-1}{2\sigma^2}\|\mathbf{x}_i - \mathbf{U}\mathbf{W}\mathbf{y}_i\|_2^2\right] - \frac{1}{2}\|\mathbf{y}_i\|_2^2$$

therefore

$$\ln q^*(\mathbf{y}_i) = \frac{-1}{2\sigma^2}\mathbf{y}_i^T \mathbb{E}_{q(\mathbf{W})}[\mathbf{W}^T \mathbf{U}^2 \mathbf{W}]\mathbf{y}_i + \frac{1}{\sigma^2}\mathbf{y}_i^T \mathbf{W}^T \mathbf{U} \mathbf{x}_i - \frac{1}{2}\|\mathbf{y}_i\|_2^2$$

which lead to the desired form.

*Variational distribution of the loading matrix.* Similarly,

$$\ln q^*(\mathbf{W}) = \frac{-1}{2\sigma^2} \sum_{i=1}^n \mathbb{E}_{q(\mathbf{y}_i)}[\|\mathbf{x}_i - \mathbf{U}\mathbf{W}\mathbf{y}_i\|_2^2] - \frac{1}{2\alpha} \sum_{i=1}^n \|\mathbf{w}_i\|_2^2$$

$$\ln q^*(\mathbf{W}) = \sum_{i=1}^n \left( \frac{-1}{2\sigma^2} \sum_{j=1}^p v_j^2 \mathbf{w}_j^T \mathbb{E}_{q(\mathbf{y}_i)}[\|\mathbf{y}_i\|_2^2] \mathbf{w}_j + \frac{1}{\sigma^2} \sum_{j=1}^p \mathbf{w}_j^T x_{i,j} v_j \mathbb{E}_{q(\mathbf{y}_i)}(\mathbf{y}_i) - \frac{1}{\alpha} \|\mathbf{w}_j\|_2^2 \right)$$

which leads to the factorization  $q^*(\mathbf{W}) = \prod_{j \leq p} q^*(\mathbf{w}_j)$  and to the desired expression.  $\blacksquare$

We can now compute the value of the free energy.

**Proposition 2** *Up to unnecessary additive constants, the entropy of the variational distribution is given by*

$$H(q) = \frac{n}{2} \ln |\boldsymbol{\Sigma}| + \frac{1}{2} \sum_{k=1}^p \ln |\mathbf{S}_k|. \quad (5)$$

**Proof** We have, using the factorizations of the former proposition

$$H(q) = -\mathbb{E}_q[\ln q(\mathbf{Y}, \mathbf{W})] = -\sum_{i=1}^n \mathbb{E}_{q(\mathbf{y}_i)}[\ln q(\mathbf{y}_i)] - \sum_{j=1}^p \mathbb{E}_{q(\mathbf{W})}[\ln q(\mathbf{W})]$$

which allows us to conclude.  $\blacksquare$

**Proposition 3** *Up to unnecessary additive constants, the negative free energy is given by*

$$\begin{aligned} -\mathcal{F}_q(\mathbf{x}_1, \dots, \mathbf{x}_n|\boldsymbol{\theta}) &= -np \ln \sigma - \frac{dp}{2} \ln \alpha - \frac{1}{2\sigma^2} \text{Tr}(\mathbf{X}^T \mathbf{X}) - \frac{1}{2\sigma^2} \sum_{i=1}^n \sum_{k=1}^p u_k^2 \text{Tr}[(\boldsymbol{\Sigma} + \boldsymbol{\mu}_i \boldsymbol{\mu}_i^T)(\mathbf{S}_k + \mathbf{m}_i \mathbf{m}_i^T)] \\ &+ \frac{1}{\sigma^2} \sum_{i=1}^n \mathbf{x}_i^T \mathbf{U} \mathbf{M} \boldsymbol{\mu}_i + \sum_{k=1}^p -\frac{1}{2\alpha} \text{Tr}(\mathbf{S}_k + \mathbf{m}_k \mathbf{m}_k^T) - \sum_{i=1}^n \text{Tr}(\boldsymbol{\Sigma} + \boldsymbol{\mu}_i \boldsymbol{\mu}_i^T) \\ &+ \frac{n}{2} \ln |\boldsymbol{\Sigma}| + \frac{1}{2} \sum_{k=1}^p \ln |\mathbf{S}_k|. \quad (6) \end{aligned}$$
